# Supplementary material for: Changes in Penile-Vaginal Intercourse Frequency and Sexual Repertoire from 2009 to 2018: Findings from the National Survey of Sexual Health and Behavior
Source: Springer Nature journal article supplement (doi:10.1007/s10508-021-02125-2), 2021-11-19

| **Table S1A.** Characteristics of the unweighted and weighted sample, overall and by year, n=1647 Americans age 14-17, 2009 and 2018 | | | | | |
| --- | --- | --- | --- | --- | --- |
| Characteristic | Unweighted  Overall  N=1647 | Weighted  Overall  N=1646 | 2009  N=821 | 2018  N=826 | p-value* |
|  | N (%) | N (%) | N (%) | N (%) |  |
| **Sex** |  |  |  |  | .790 |
| Female | 822 (49.9) | 813 (49.4) | 403 (49.1) | 411 (49.7) |  |
| Male | 825 (50.1) | 833 (50.6) | 418 (50.9) | 415 (50.3) |  |
| **Age group** |  |  |  |  | .658 |
| 14-15 | 797 (48.4) | 779 (47.3) | 384 (46.8) | 395 (47.9) |  |
| 16-17 | 850 (51.6) | 867 (52.7) | 437 (53.2) | 431 (52.1) |  |
| **Race/ethnicity** |  |  |  |  | .049 |
| White, non-Hispanic | 1158 (70.4) | 947 (57.6) | 494 (60.5) | 452 (54.8) |  |
| Black, non-Hispanic | 139 (8.5) | 226 (13.8) | 114 (14.0) | 112 (13.5) |  |
| Other or 2+ races, non-Hispanic | 151 (9.2) | 135 (8.2) | 59 (7.2) | 77 (9.3) |  |
| Hispanic | 196 (11.9) | 335 (20.4) | 150 (18.4) | 185 (22.4) |  |
| **Household income** |  |  |  |  | <.0001 |
| <$25k | 204 (12.4) | 214 (13.0) | 104 (12.7) | 110 (13.4) |  |
| $25-49k | 291 (17.7) | 331 (20.1) | 178 (21.7) | 153 (18.5) |  |
| $50-74k | 376 (22.8) | 305 (18.6) | 171 (20.9) | 134 (16.2) |  |
| $75-124k | 479 (29.1) | 449 (27.3) | 236 (28.7) | 214 (25.9) |  |
| $125k+ | 297 (18.0) | 346 (21.0) | 131 (16.0) | 215 (26.1) |  |
| **Sexual repertoire categories (At least once in the past year)** |  |  |  |  |  |
| Masturbate alone | 777 (48.1) | 773 (47.8) | 453 (56.0) | 320 (39.5) | <.0001 |
| Masturbate with partner | 150 (9.3) | 152 (9.4) | 98 (12.2) | 54 (6.7) | .0001 |
| Gave oral sex | 214 (13.2) | 201 (12.4) | 139 (17.2) | 62 (7.7) | <.0001 |
| Received oral sex | 243 (15.0) | 248 (15.3) | 168 (20.8) | 79 (9.9) | <.0001 |
| Penile-vaginal intercourse | 248 (15.3) | 255 (15.8) | 165 (20.5) | 90 (11.1) | <.0001 |
| Anal intercourse | 38 (2.3) | 50 (3.1) | 36 (4.4) | 14 (1.7) | .001 |
| **Table S1b.** Characteristics of the unweighted and weighted sample, overall and by year, n=7055 Americans age 18-49, 2009 and 2018 | | | | | |
| Characteristic | Unweighted  Overall  N=7055 | Weighted  Overall  N=6789 | 2009  N=3070 | 2018  N=3719 | p-value* |
|  | N (%) | N (%) | N (%) | N (%) |  |
| **Sex** |  |  |  |  | .322 |
| Female | 3598 (51.0) | 3478 (51.2) | 1593 (51.9) | 1885 (50.7) |  |
| Male | 3457 (49.0) | 3311 (48.8) | 1477 (48.1) | 1834 (49.3) |  |
| **Age group** |  |  |  |  | <.0001 |
| 18-24 | 915 (13.0) | 1087 (16.0) | 468 (15.3) | 618 (16.6) |  |
| 25-29 | 1360 (19.3) | 1547 (22.8) | 738 (24.0) | 809 (21.8) |  |
| 30-39 | 2331 (33.0) | 2018 (29.7) | 840 (27.4) | 1177 (31.7) |  |
| 40-49 | 2449 (34.7) | 2138 (31.5) | 1023 (33.3) | 1114 (30.0) |  |
| **Race/ethnicity** |  |  |  |  | <.0001 |
| White, non-Hispanic | 4517 (64.0) | 4136 (60.9) | 2005 (65.3) | 2131 (57.3) |  |
| Black, non-Hispanic | 1118 (15.9) | 806 (11.9) | 331 (10.8) | 475 (12.8) |  |
| Other or 2+ races, non-Hispanic | 523 (7.4) | 565 (8.3) | 215 (7.0) | 350 (9.4) |  |
| Hispanic | 897 (12.7) | 1283 (18.9) | 519 (16.9) | 763 (20.5) |  |
| **Marital status** |  |  |  |  | .002 |
| Married or living with partner | 3993 (56.6) | 3890 (57.3) | 1747 (56.9) | 2143 (57.6) |  |
| Separated/divorced | 590 (8.4) | 515 (7.6) | 271 (8.8) | 244 (6.6) |  |
| Widowed | 30 (0.4) | 34 (0.5) | 19 (0.6) | 15 (0.4) |  |
| Never married | 2442 (34.6) | 2350 (34.6) | 1033 (33.6) | 1318 (35.4) |  |
| **Household income** |  |  |  |  | <.0001 |
| <$25k | 1267 (18.0) | 987 (14.5) | 540 (17.6) | 447 (12.0) |  |
| $25-49k | 1618 (22.9) | 1587 (23.4) | 894 (29.1) | 693 (18.6) |  |
| $50-74k | 1443 (20.5) | 1363 (20.1) | 706 (23.0) | 656 (17.6) |  |
| $75-124k | 1813 (25.7) | 1731 (25.5) | 707 (23.0) | 1024 (27.5) |  |
| $125k+ | 914 (13.0) | 1122 (16.5) | 222 (7.2) | 899 (24.2) |  |
| **Education** |  |  |  |  | .535 |
| Less than high school | 592 (8.4) | 705 (10.4) | 316 (10.3) | 389 (10.5) |  |
| High school | 1637 (23.2) | 1844 (27.1) | 860 (28.0) | 983 (26.4) |  |
| Some college | 2081 (29.5) | 2060 (30.3) | 919 (29.9) | 1141 (30.7) |  |
| Bachelor’s degree or higher | 2745 (38.9) | 2181 (32.1) | 974 (31.7) | 1026.9 (32.5) |  |
| **Employment status** |  |  |  |  | <.0001 |
| Currently employed | 5445 (77.2) | 5123 (75.5) | 2247 (73.2) | 2876 (77.3) |  |
| Currently unemployed | 1610 (22.8) | 1666 (24.5) | 823 (26.8) | 844 (22.7) |  |
| **Sexual repertoire categories (At least once in the past year)** |  |  |  |  |  |
| Masturbate alone | 4752 (74.4) | 4716 (72.6) | 2144 (72.7) | 2573 (72.5) | .898 |
| Masturbate with partner | 2417 (37.8) | 2439 (37.5) | 1238 (42.0) | 1201 (33.8) | <.0001 |
| Gave oral sex | 4074 (63.4) | 4090 (62.7) | 1939 (65.3) | 2151 (60.4) | <.0001 |
| Received oral sex | 4174 (65.0) | 4206 (64.4) | 1990 (67.1) | 2216 (62.2) | <.0001 |
| Penile-vaginal intercourse | 4774 (74.6) | 4810 (74.0) | 2254 (76.5) | 2556 (71.9) | <.0001 |
| Anal intecourse | 1183 (18.4) | 1224 (18.8) | 588 (20.0) | 636 (17.8) | .020 |

*p-values are for chi-square tests

Figure Supplementary 1A. Participants reports’ of sexual behaviors occurring at least once in the prior year.


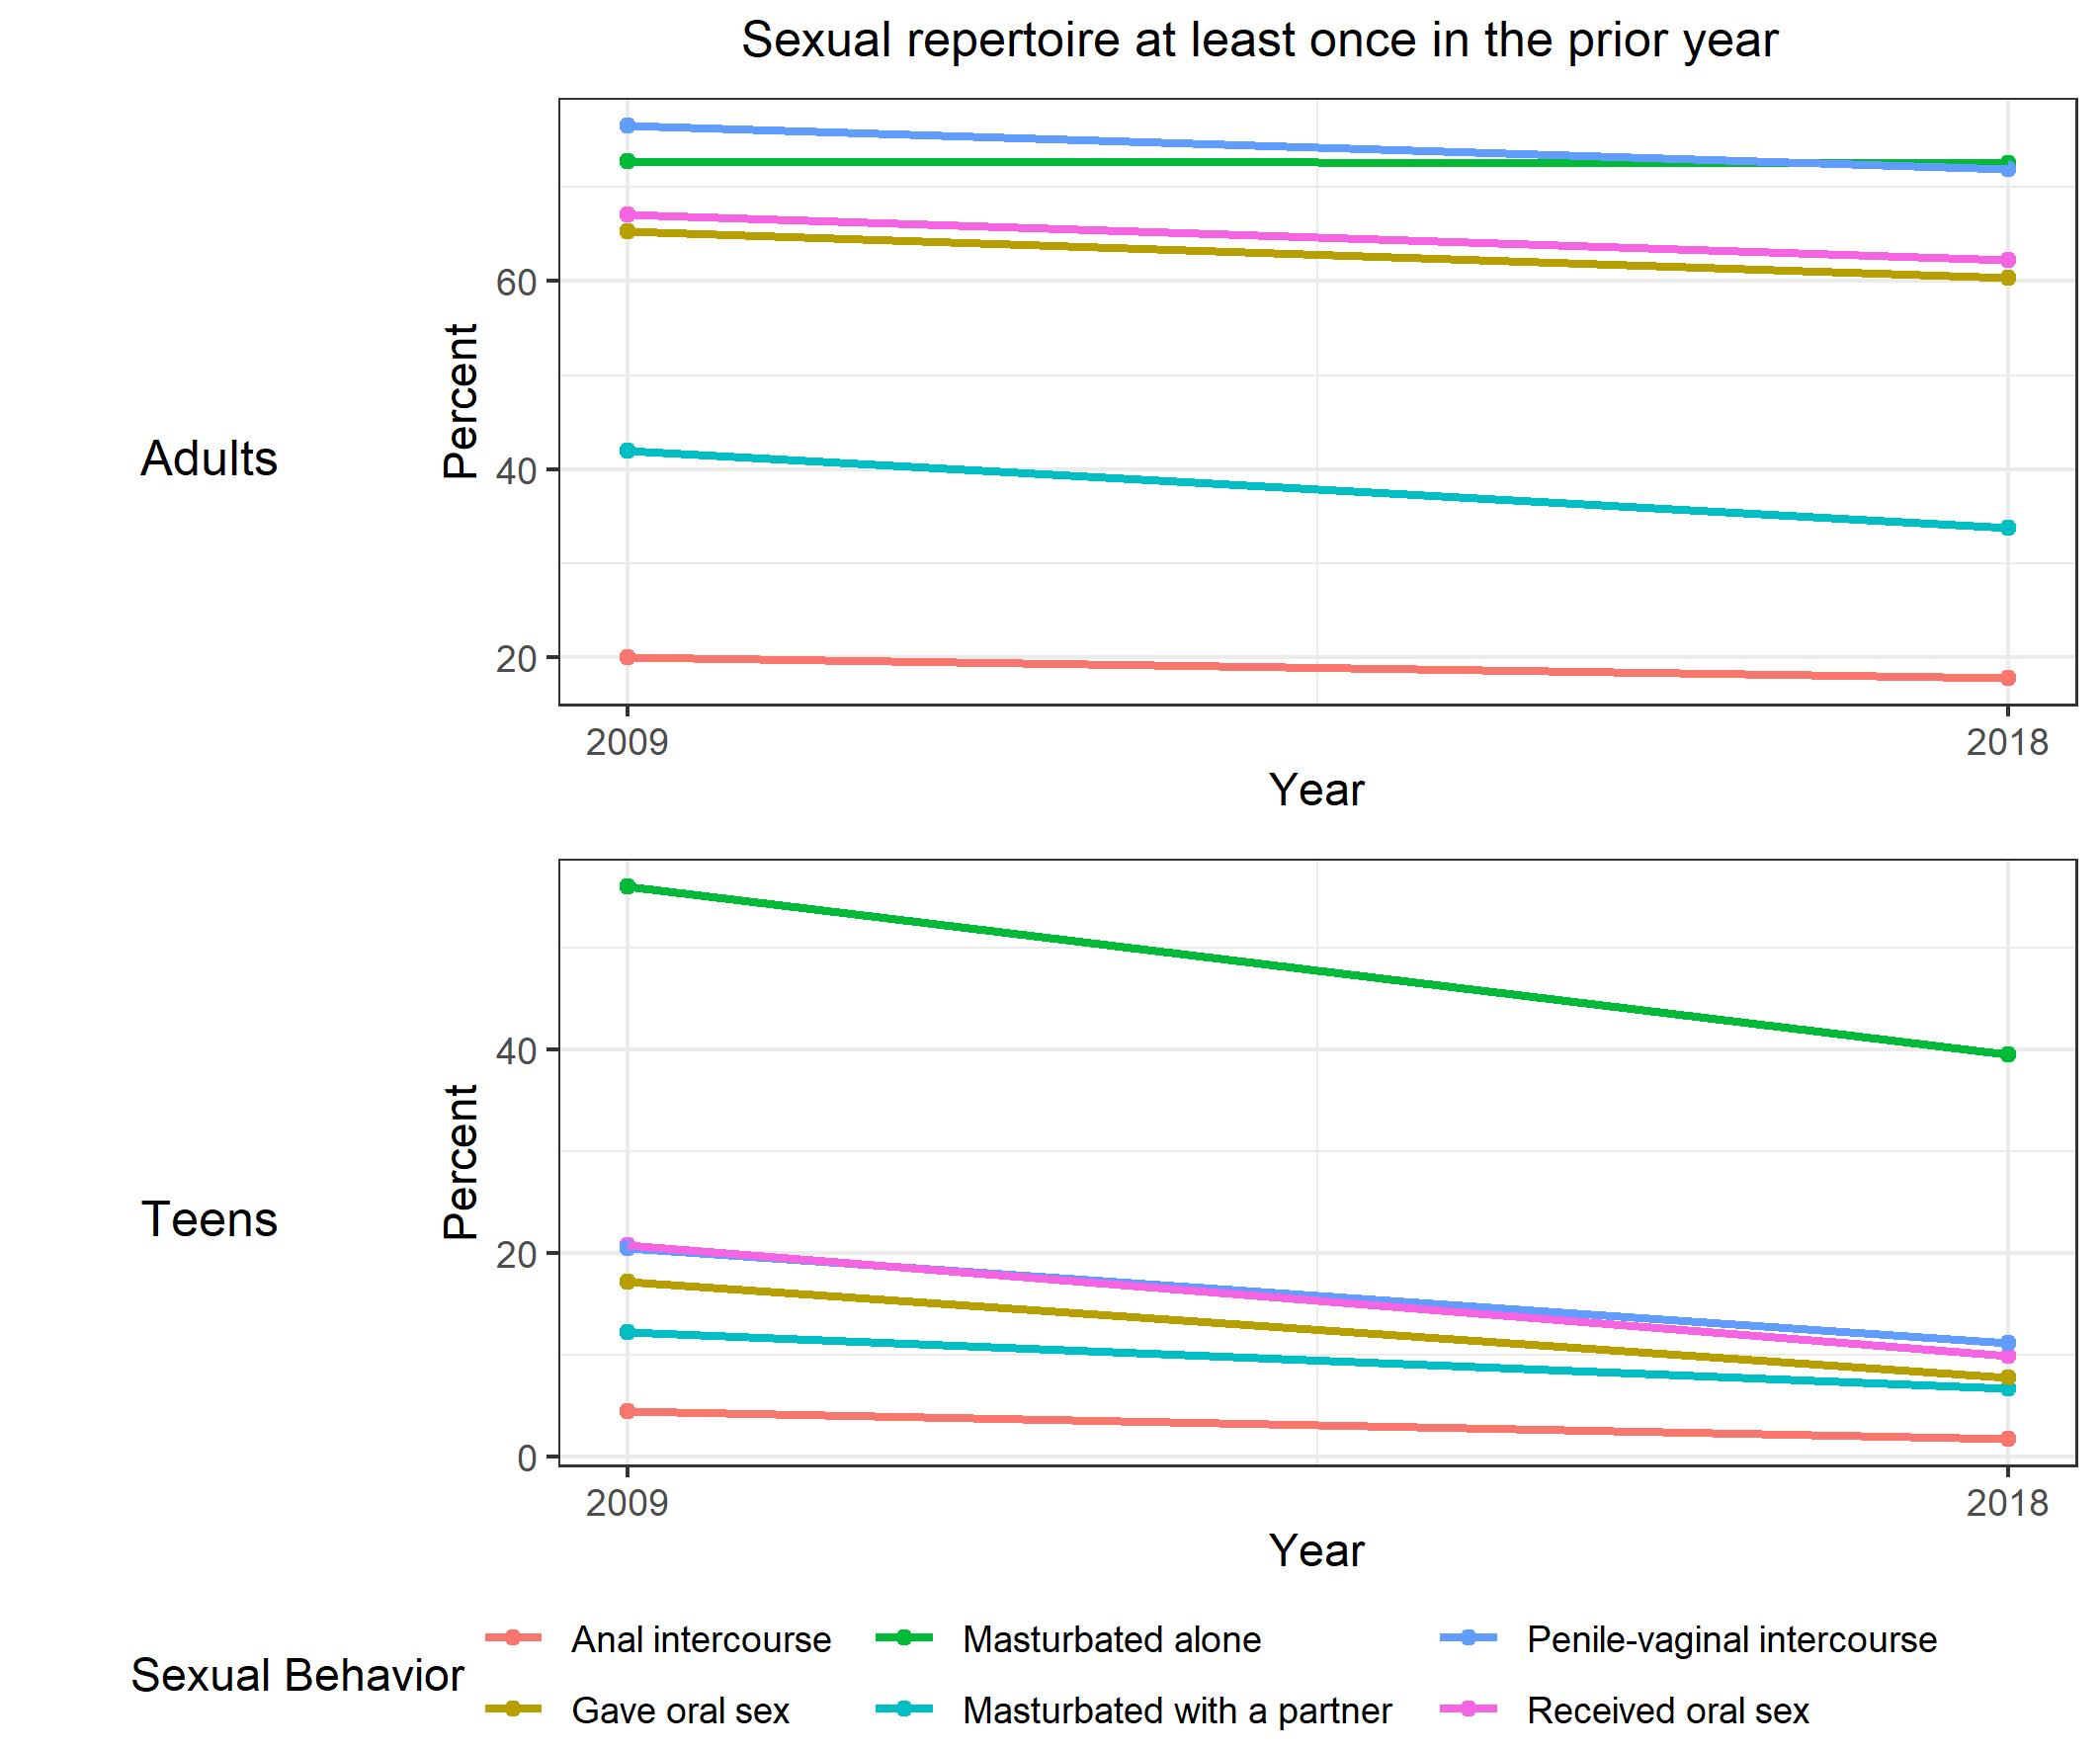

Supplement: 10508_2021_2125_MOESM1_ESM.docx [file 10508_2021_2125_MOESM1_ESM.docx]
